# Supplementary material
Source: PubMed Central journal article supplement (PMC5545759)

# checkCIF/PLATON report

Structure factors have been supplied for datablock(s) C8OBTBTOC8rtHB

THIS REPORT IS FOR GUIDANCE ONLY. IF USED AS PART OF A REVIEW PROCEDURE FOR PUBLICATION, IT SHOULD NOT REPLACE THE EXPERTISE OF AN EXPERIENCED CRYSTALLOGRAPHIC REFEREE.

No syntax errors found.      CIF dictionary      Interpreting this report

## Datablock: C8OBTBTOC8rtHB

---

Bond precision:    C-C = 0.0204 A

Wavelength=0.70000

Cell:                    a=31.056(6)            b=7.663(2)            c=5.996(1)  
                          alpha=90            beta=94.18(3)            gamma=90  
Temperature:            298 K

|                | Calculated    | Reported      |
|----------------|---------------|---------------|
| Volume         | 1423.2(5)     | 1423.1(5)     |
| Space group    | P 21/c        | P 21/c        |
| Hall group     | -P 2ybc       | -P 2ybc       |
| Moiety formula | C30 H40 O2 S2 | C60 H80 O4 S4 |
| Sum formula    | C30 H40 O2 S2 | C60 H80 O4 S4 |
| Mr             | 496.74        | 993.48        |
| Dx,g cm-3      | 1.159         | 1.159         |
| Z              | 2             | 1             |
| Mu (mm-1)      | 0.200         | 0.200         |
| F000           | 536.0         | 536.0         |
| F000'          | 536.65        |               |
| h,k,lmax       | 25,6,4        | 25,6,4        |
| Nref           | 818           | 806           |
| Tmin,Tmax      | 0.995,0.998   | 0.475,0.744   |
| Tmin'          | 0.984         |               |

Correction method= # Reported T Limits: Tmin=0.475 Tmax=0.744  
AbsCorr = MULTI-SCAN

Data completeness= 0.985

Theta(max)= 16.664

R(reflections)= 0.0951( 473)

wR2(reflections)= 0.2835( 806)

S = 1.014

Npar= 79

---

The following ALERTS were generated. Each ALERT has the format

**test-name\_ALERT\_alert-type\_alert-level.**

Click on the hyperlinks for more details of the test.

---

 **Alert level A**

THETM01\_ALERT\_3\_A The value of  $\sin(\theta_{\max})/\lambda$  is less than 0.550  
Calculated  $\sin(\theta_{\max})/\lambda = 0.4097$

**Author Response: Crystals diffracted poorly at RT (best ones show reflections at a maximum resolution of ~1.25 Å). Radiation damage have been found and limited the maximum dose allowed per data collection.**

---

PLAT201\_ALERT\_2\_A Isotropic non-H Atoms in Main Residue(s) ..... 15 Report

**Author Response: Crystals diffracted poorly at RT (best ones show reflections at a maximum resolution of ~1.25 Å), so few data were available for refinement. Number of model parameters have been kept low to avoid overrefinement. Anisotropic thermal motion modelling have been applied only to sulphur and oxygen atoms.**

---

 **Alert level B**

PLAT340\_ALERT\_3\_B Low Bond Precision on C-C Bonds ..... 0.0204 Å.

**Author Response: Crystals diffracted poorly at RT (best ones show reflections at a maximum resolution of ~1.25 Å) and were prone to radiation damage. This error is due to high model e.s.d., mainly found on terminal atoms of flexible hydrocarburic tails.**

---

 **Alert level C**

RINTA01\_ALERT\_3\_C The value of Rint is greater than 0.12  
Rint given 0.146

PLAT020\_ALERT\_3\_C The value of Rint is greater than 0.12 ..... 0.146 Report  
PLAT084\_ALERT\_3\_C High wR2 Value (i.e. > 0.25) ..... 0.28 Report  
PLAT220\_ALERT\_2\_C Non-Solvent Resd 1 C Ueq(max)/Ueq(min) Range 4.2 Ratio  
PLAT222\_ALERT\_3\_C Non-Solvent Resd 1 H Uiso(max)/Uiso(min) Range 4.6 Ratio  
PLAT242\_ALERT\_2\_C Low 'MainMol' Ueq as Compared to Neighbors of C20\_1 Check  
PLAT905\_ALERT\_3\_C Negative K value in the Analysis of Variance ... -0.187 Report  
PLAT911\_ALERT\_3\_C Missing # FCF Refl Between THmin & STh/L= 0.410 12 Report  
PLAT978\_ALERT\_2\_C Number C-C Bonds with Positive Residual Density. 0 Note

---

 **Alert level G**

ABSMU01\_ALERT\_1\_G Calculation of `_exptl_absorpt_correction_mu`  
not performed for this radiation type.

PLAT042\_ALERT\_1\_G Calc. and Reported MoietyFormula Strings Differ Please Check  
PLAT045\_ALERT\_1\_G Calculated and Reported Z Differ by a Factor ... 2.00 Check  
PLAT072\_ALERT\_2\_G SHELXL First Parameter in WGHT Unusually Large 0.14 Report  
PLAT720\_ALERT\_4\_G Number of Unusual/Non-Standard Labels ..... 37 Note  
PLAT909\_ALERT\_3\_G Percentage of Observed Data at Theta(Max) Still 37 % Note

PLAT910\_ALERT\_3\_G Missing # of FCF Reflection(s) Below Theta(Min) 1 Note  
PLAT933\_ALERT\_2\_G Number of OMIT Records in Embedded .res File ... 1 Note

---

2 **ALERT level A** = Most likely a serious problem - resolve or explain  
1 **ALERT level B** = A potentially serious problem, consider carefully  
9 **ALERT level C** = Check. Ensure it is not caused by an omission or oversight  
8 **ALERT level G** = General information/check it is not something unexpected

3 ALERT type 1 CIF construction/syntax error, inconsistent or missing data  
6 ALERT type 2 Indicator that the structure model may be wrong or deficient  
10 ALERT type 3 Indicator that the structure quality may be low  
1 ALERT type 4 Improvement, methodology, query or suggestion  
0 ALERT type 5 Informative message, check

---

---

It is advisable to attempt to resolve as many as possible of the alerts in all categories. Often the minor alerts point to easily fixed oversights, errors and omissions in your CIF or refinement strategy, so attention to these fine details can be worthwhile. In order to resolve some of the more serious problems it may be necessary to carry out additional measurements or structure refinements. However, the purpose of your study may justify the reported deviations and the more serious of these should normally be commented upon in the discussion or experimental section of a paper or in the "special\_details" fields of the CIF. checkCIF was carefully designed to identify outliers and unusual parameters, but every test has its limitations and alerts that are not important in a particular case may appear. Conversely, the absence of alerts does not guarantee there are no aspects of the results needing attention. It is up to the individual to critically assess their own results and, if necessary, seek expert advice.

### **Publication of your CIF in IUCr journals**

A basic structural check has been run on your CIF. These basic checks will be run on all CIFs submitted for publication in IUCr journals (*Acta Crystallographica*, *Journal of Applied Crystallography*, *Journal of Synchrotron Radiation*); however, if you intend to submit to *Acta Crystallographica Section C* or *E* or *IUCrData*, you should make sure that full publication checks are run on the final version of your CIF prior to submission.

### **Publication of your CIF in other journals**

Please refer to the *Notes for Authors* of the relevant journal for any special instructions relating to CIF submission.

---

**PLATON version of 27/03/2017; check.def file version of 24/03/2017**

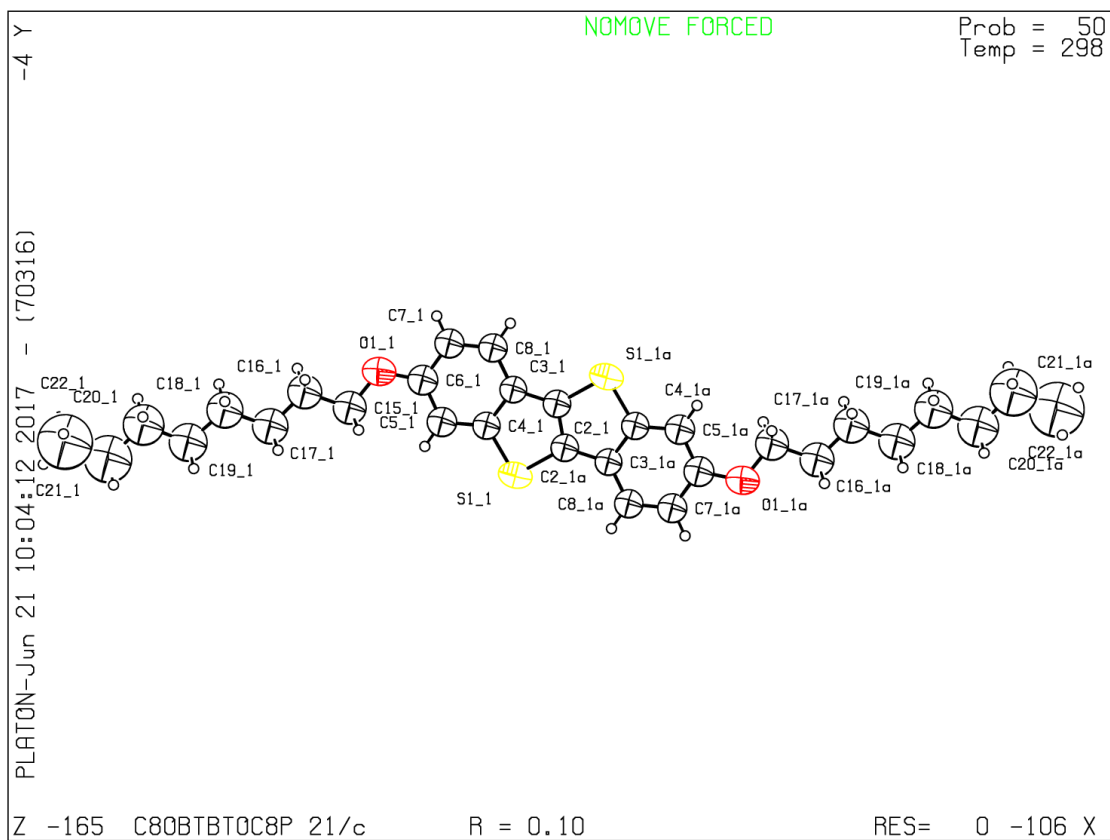

Supplement: jz7b01634_si_003.pdf [file jz7b01634_si_003.pdf]
